# Supplementary material for: Controllable seeded flux growth and optoelectronic properties of bulk o-SiP crystals
Source: Royal Society of Chemistry journal article supplement (doi:10.1039/c7ce01676j), 2017-01-01
Supplement: c7ce01676j1.pdf [file c7ce01676j1.pdf]

Journal Name

ARTICLE

## Controllable Seeded Flux Growth and Optic-electric Properties of Bulk o-SiP Crystals

Received 00th January 20xx,  
Accepted 00th January 20xx

DOI: 10.1039/x0xx00000x

[www.rsc.org/](http://www.rsc.org/)

Chunlong Li,<sup>a</sup> Shanpeng Wang,<sup>\*ab</sup> Xixia Zhang,<sup>a</sup> Ning Jia,<sup>a</sup> Tongtong Yu,<sup>a</sup> Min Zhu,<sup>a</sup> Duo Liu,<sup>ab</sup>  
and Xutang Tao<sup>\*ab</sup>

### Supporting information

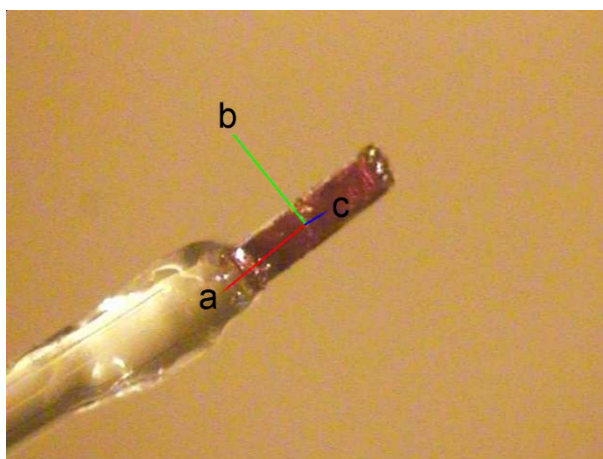

Figure S1. The crystalline orientation of single-crystal flake was determined by single-crystal X-ray.

<sup>a</sup> State Key Laboratory of Crystal Materials, Shandong University, Jinan, 250100, China.

<sup>b</sup> Key Laboratory of Functional Crystal Materials and Device (Shandong University, Ministry of Education), Jinan, 250100, China.

Electronic Supplementary Information (ESI) available: [details of any supplementary information available should be included here]. See DOI: 10.1039/x0xx00000x

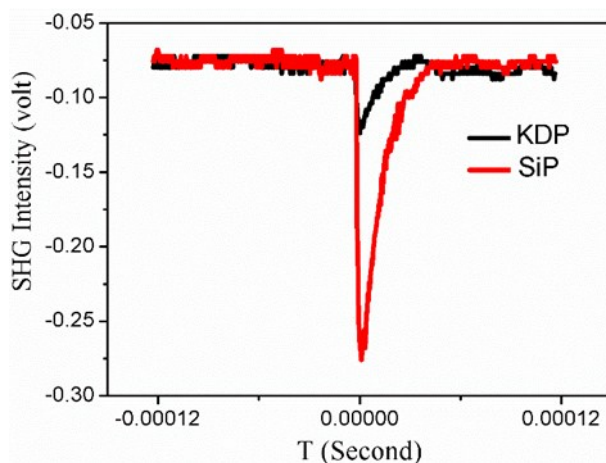

Figure S2. Oscilloscope traces of SHG signals for o-SiP with KDP as a reference.

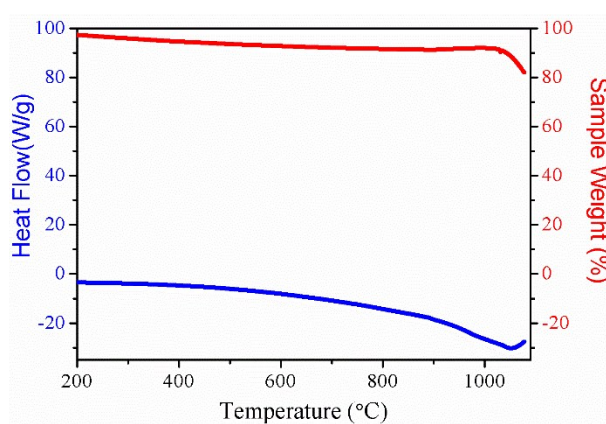

Figure S3. DSC/TG data of o-SiP. Blue curve represents DSC and red curve represents TG. The sample decomposes at 1045 °C, where the endothermic peak in the DSC curve together with the dramatic weight loss indicates decomposition of the crystal.

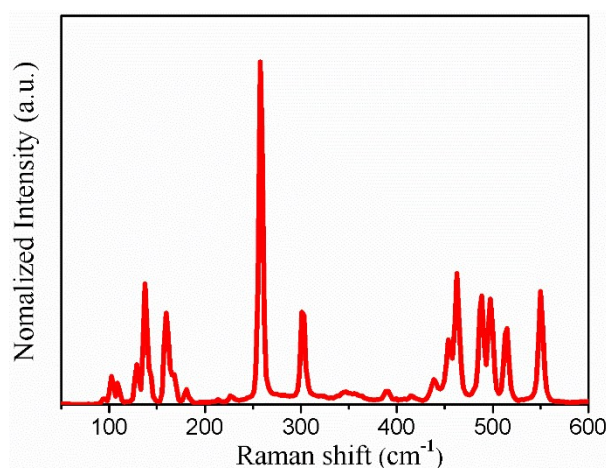

Figure S4. Raman spectrum of o-SiP crystal grown by flux method.

Table S1. Crystallographic Data and Structure Refinement for o-SiP

|                   |          |
|-------------------|----------|
| Empirical formula | SiP      |
| Formula weight    | 59.06    |
| Temperature       | 293(2) K |

|                                                           |                                                                      |
|-----------------------------------------------------------|----------------------------------------------------------------------|
| Wavelength (Å)                                            | 0.71073                                                              |
| Crystal system                                            | Orthorhombic                                                         |
| Space group                                               | Cmc2 <sub>1</sub>                                                    |
| Unit cell dimensions (Å)                                  | <i>a</i> = 3.5255(6)<br><i>b</i> = 20.563(4)<br><i>c</i> = 13.666(2) |
| Volume (Å <sup>3</sup> )                                  | 990.7(3)                                                             |
| Z, Calculated density                                     | 16, 1.584 mg/m <sup>3</sup>                                          |
| Absorption coefficient                                    | 1.163 mm <sup>-1</sup>                                               |
| F(000)                                                    | 464                                                                  |
| Crystal size                                              | 0.18mm × 0.12mm × 0.11mm                                             |
| Theta range for data collection                           | 1.98 to 27.47 deg.                                                   |
| Limiting indices                                          | -4 ≤ <i>h</i> ≤ 4, -26 ≤ <i>k</i> ≤ 26, -17 ≤ <i>l</i> ≤ 17          |
| Reflections collected / unique                            | 5513 / 1310                                                          |
| R(int)                                                    | 0.0254                                                               |
| Completeness to theta = 27.47                             | 99.3 %                                                               |
| Refinement method                                         | Full-matrix least-squares on F <sup>2</sup>                          |
| Data / restraints / parameters                            | 1310 / 1 / 74                                                        |
| Goodness-of-fit on F <sup>2</sup>                         | 1.199                                                                |
| Final R indices [ <i>I</i> > 2σ( <i>I</i> )] <sup>b</sup> | R1 = 0.0215, wR2 = 0.0658                                            |
| R indices (all data)                                      | R1 = 0.0217, wR2 = 0.0660                                            |
| Absolute structure parameter                              | 0.4(3)                                                               |
| Extinction coefficient                                    | 0.0001(4)                                                            |
| Largest diff. peak and minimum                            | 0.495 and -0.443 e.Å <sup>-3</sup>                                   |

Table S2. Hall effect measurements

| Test condition   |        | Result                                                 |           |
|------------------|--------|--------------------------------------------------------|-----------|
| I (nA)           | 10     | Nb (cm <sup>-3</sup> )                                 | 1.214E+10 |
| B (T)            | 0.55   | u (cm <sup>2</sup> ·V <sup>-1</sup> ·s <sup>-1</sup> ) | 2.034E+03 |
| Thickness (μm)   | 320.00 | Rho (Ω·cm)                                             | 2.527E+05 |
| Delay Time (s)   | 0.100  | RH (cm <sup>3</sup> ·C <sup>-1</sup> )                 | 5.141E+08 |
| Measure Time (h) | 0.100  | RHA (cm <sup>3</sup> ·C <sup>-1</sup> )                | 4.116E+08 |
| T(K)             | 300    | RHB (cm <sup>3</sup> ·C <sup>-1</sup> )                | 6.166E+08 |
